# Supplementary material for: Structural basis of methotrexate and pemetrexed action on serine hydroxymethyltransferases revealed using plant models
Source: PubMed Central journal article supplement (PMC6928210; doi:10.1038/s41598-019-56043-4), 2019-12-23
Supplement: 41598_2019_56043_MOESM1_ESM.pdf [file 41598_2019_56043_MOESM1_ESM.pdf]

## Supplementary Information

### **Structural basis of methotrexate and pemetrexed action on serine hydroxymethyltransferases revealed using plant models**

Milosz Ruzzkowski<sup>1,2\*</sup>, Bartosz Sekula<sup>1</sup>, Agnieszka Ruzzkowska<sup>3,2</sup>, Roberto Contestabile<sup>4</sup>, Isabel Nogues<sup>5</sup>,  
Sebastiana Angelaccio<sup>4</sup>, Andrzej Szczepaniak<sup>6</sup>, and Zbigniew Dauter<sup>1</sup>

<sup>1</sup>Synchrotron Radiation Research Section of MCL, National Cancer Institute, Argonne, IL, USA

<sup>2</sup>Institute of Bioorganic Chemistry, Polish Academy of Sciences, Poznan, Poland

<sup>3</sup>Department of Chemistry and Biochemistry, University of Notre Dame, Notre Dame, IN, USA

<sup>4</sup>Department of Biochemical Sciences "A. Rossi Fanelli", Sapienza University of Rome,

Laboratory affiliated to Istituto Pasteur Italia-Fondazione Cenci Bolognetti, P.le Aldo Moro 5, 00185 Roma, Italy

<sup>5</sup>Research Institute of Terrestrial Ecosystems, Italian National Research Council, Via Salaria Km. 29,  
300-00015 Monterotondo Scalo, Roma, Italy

<sup>6</sup>Department of Hematology and Bone Marrow Transplantation,  
Poznan University of Medical Sciences, Poznan, Poland

\*To whom the correspondence should be addressed:

Milosz Ruzzkowski, Institute of Bioorganic Chemistry, Polish Academy of Sciences,  
Noskowskiego 12/14 Poznan, Poland; mruszkowski@ibch.poznan.pl

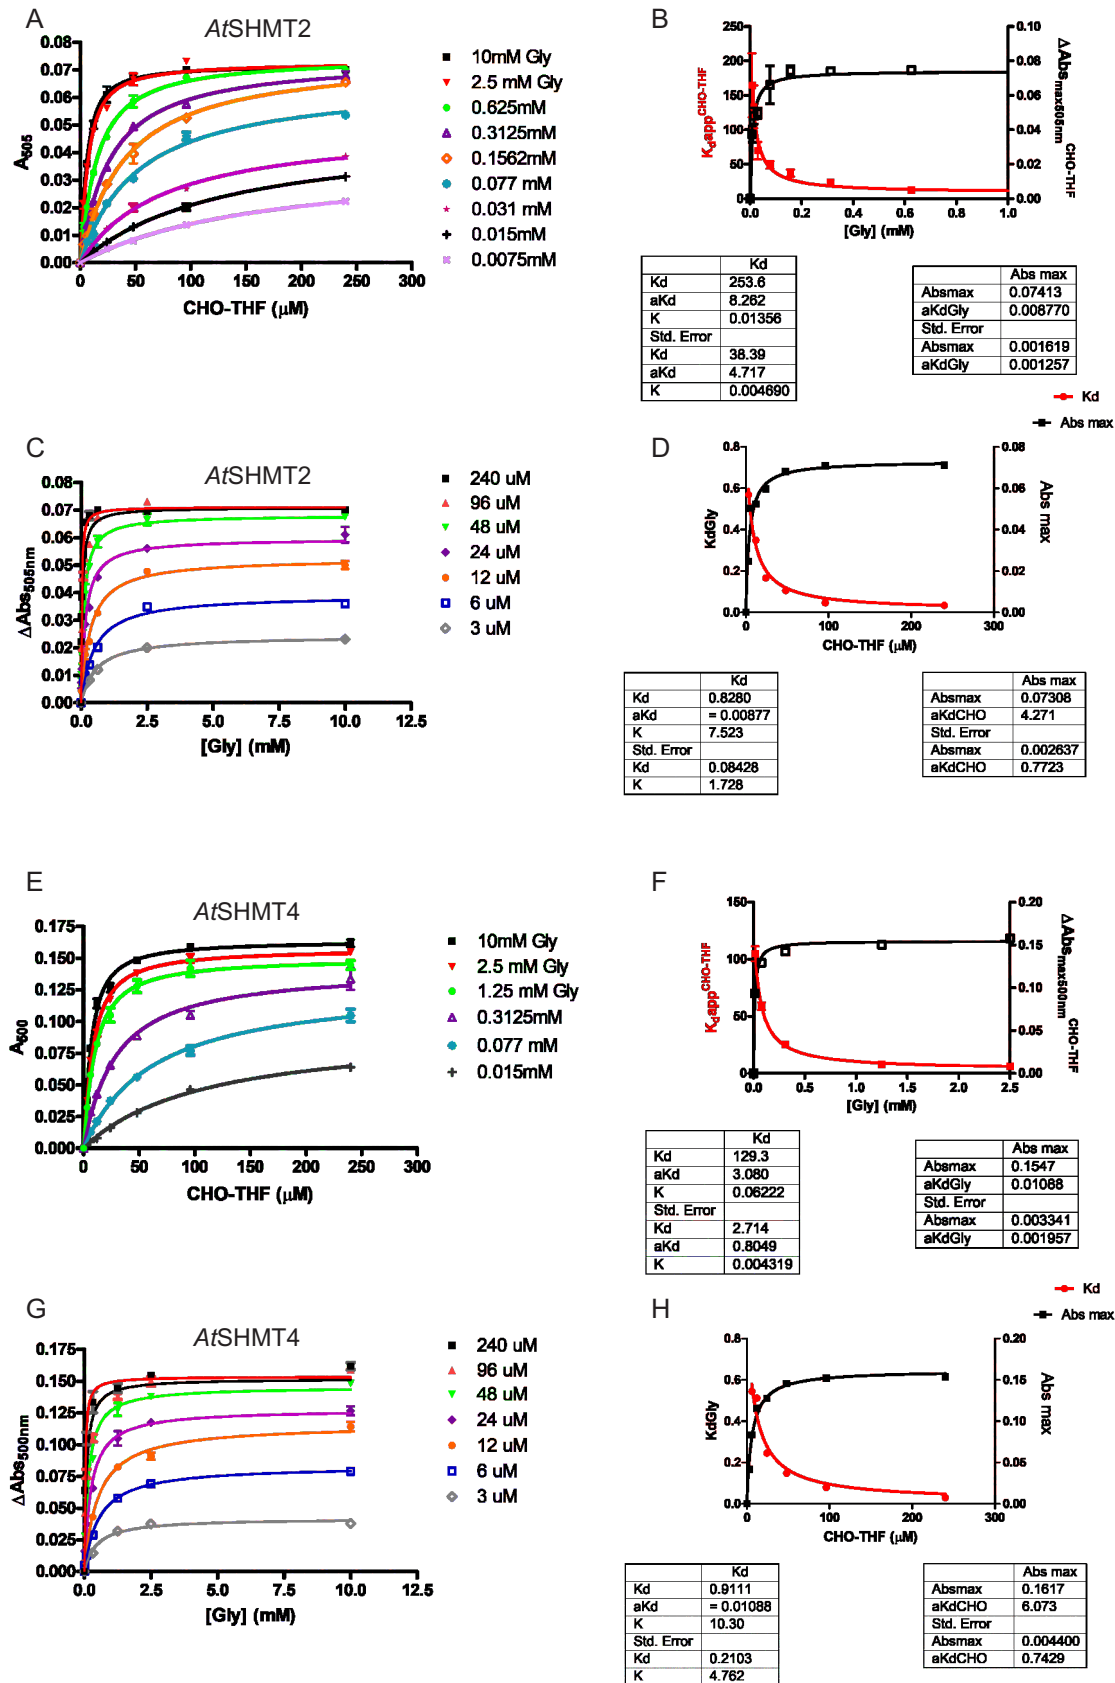

### Supplementary figure S1

Determination of glycine and 5-formyl-THF (CHO-THF) binding parameters. Panel A-B show *AtSHMT2* with variable 5-formyl-THF; C-D, *AtSHMT2* with variable glycine; E-F, *AtSHMT4* with variable 5-formyl-THF; G-H *AtSHMT4* with variable glycine. Assays were performed at 30 °C, in 20 mM KPi buffer at pH 8.0 for *AtSHM2* and pH 7.3 for *AtSHMT4*. Absorbance was measured at 505 nm (*AtSHMT2*) and 500 nm (*AtSHMT4*) from the quinonoid intermediate formed upon addition of 5-formyl-THF to samples containing protein (5 mM) and glycine. Samples with varied 5-formyl-THF (glycine at different fixed concentrations) and samples with varied glycine (5-formyl-THF at different fixed concentrations) were measured at equilibrium. The obtained saturation curves were fitted to obtained  $K_d$  and  $\alpha K_d$  values as explained in Tramonti *et al.*, 2018.

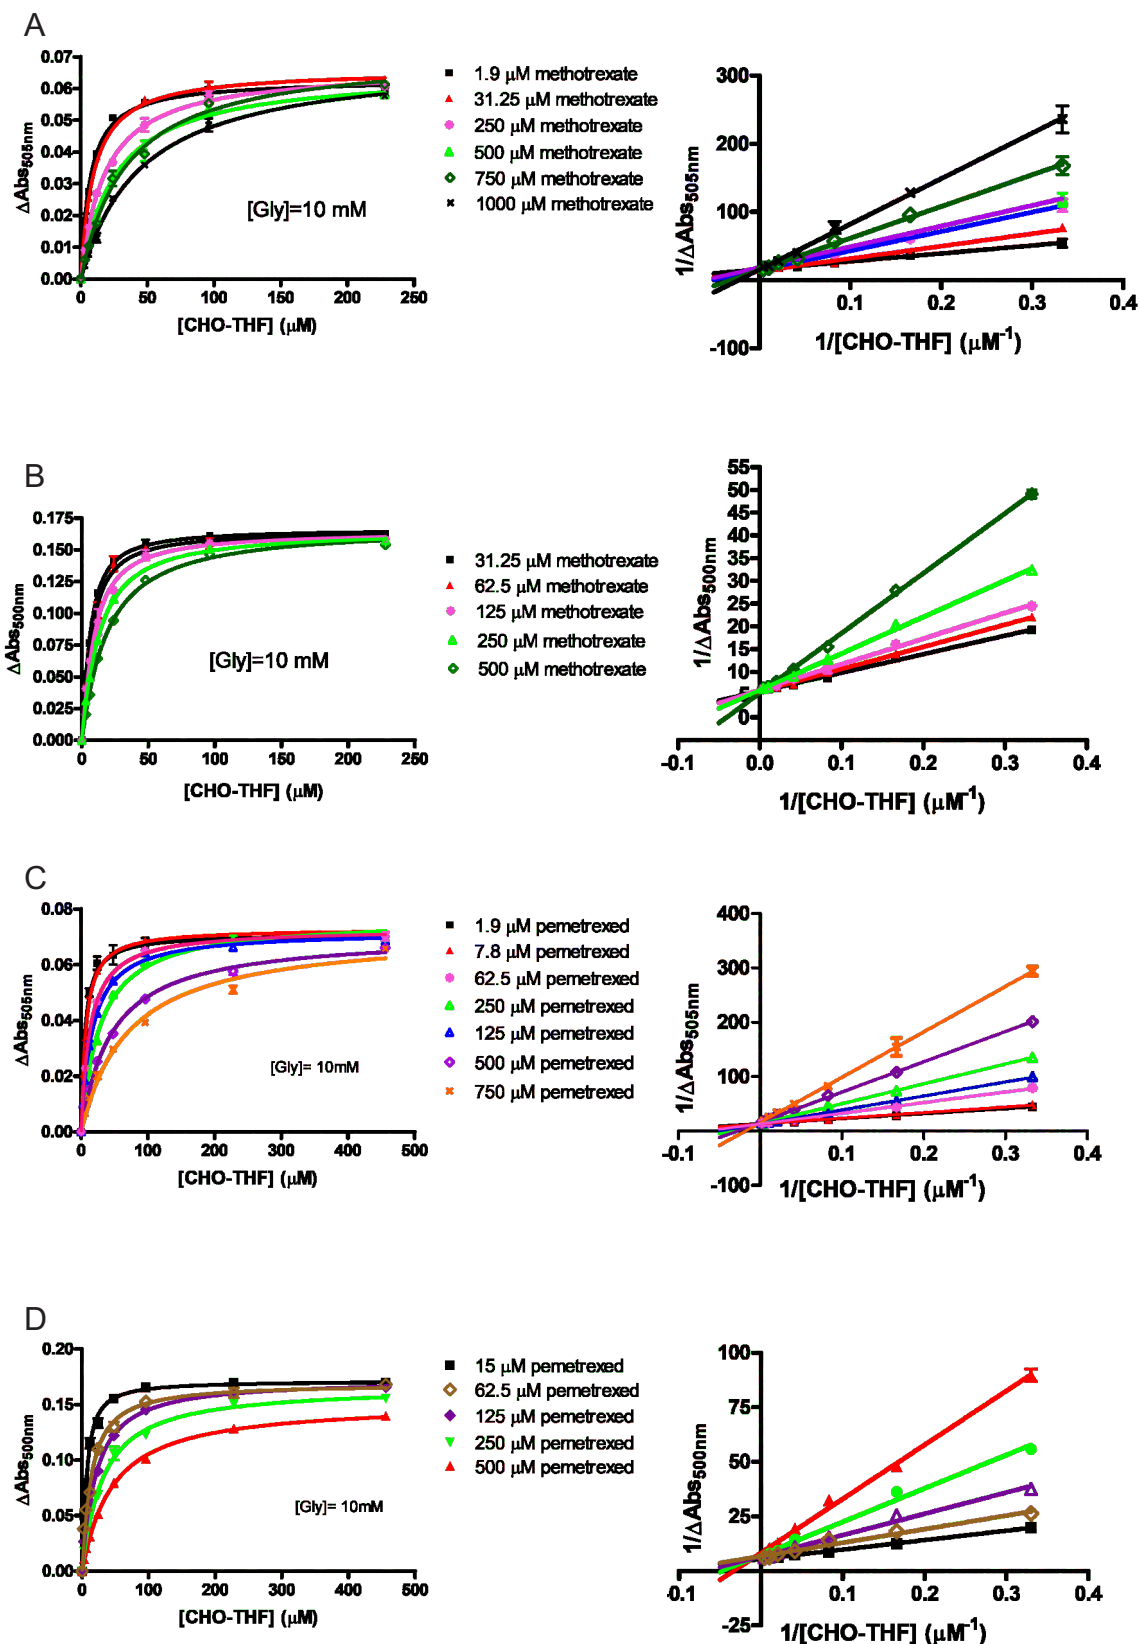

### Supplementary figure S2

Methotrexate and pemetrexed inhibition experiments with *AtSHMT2* and *AtSHMT4*. Panel A shows data for *AtSHMT2* inhibition by methotrexate; B, *AtSHMT4* by methotrexate; C, *AtSHMT2* by pemetrexed; D, *AtSHMT4* by pemetrexed. Absorbance at 505 nm (*AtSHMT2*) or 500 nm (*AtSHMT4*) from the quinonoid intermediate formed upon addition of 5-formyl-THF to samples containing enzyme (5 mM), glycine (10 mM), and the antifolate was measured at equilibrium. Right-side charts show double reciprocal plots of data shown in left-side panels fitted to a linear equation.
